# Supplementary material
Source: Springer Nature journal article supplement (https://www.springermedizin.de/resource/supplementary/12885_2010_2564_MOESM2_ESM.pdf/9462578)

Probability of Progression-Free Survival

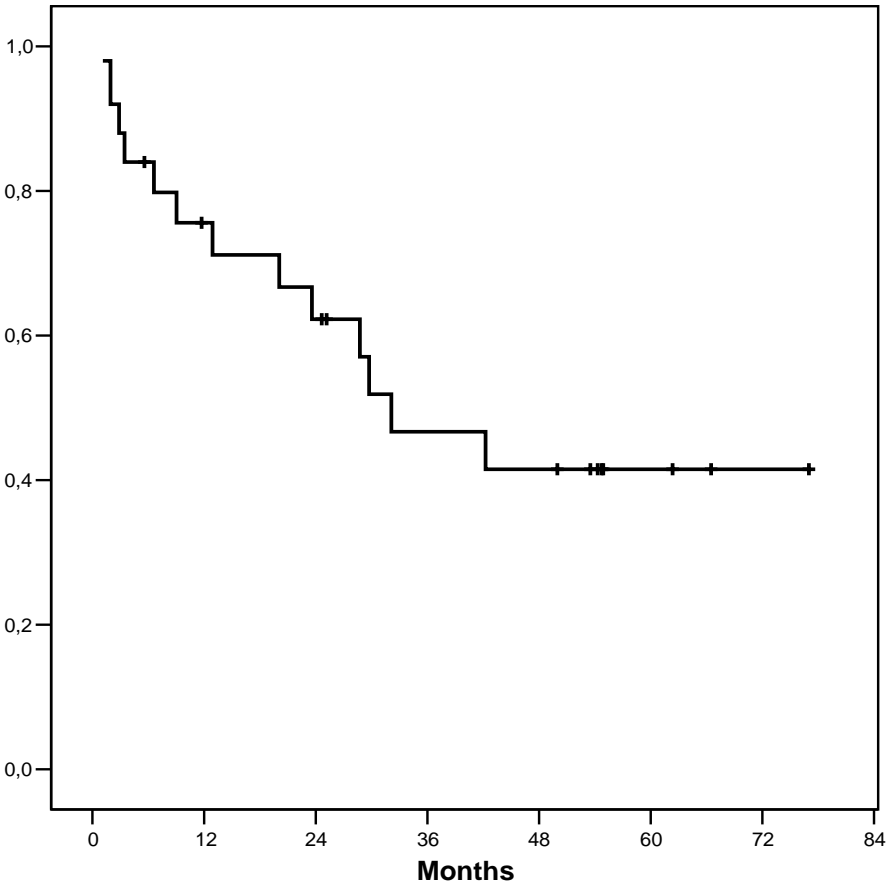

Supplement: MOESM2 [file 9462578]
